# Supplementary material for: Theoretical study on the toxicity of ‘Novichok’ agent candidates
Source: PubMed Central journal article supplement (PMC6731729; doi:10.1098/rsos.190414), 2019-08-07
Supplement: rsos190414supp1.pdf [file rsos190414supp1.pdf]

# Electronic Supplementary Material

## Theoretical study on the toxicity of “Novichok” agent candidates

Keunhong Jeong<sup>a</sup>, Junwon Choi<sup>b</sup>

<sup>a</sup>Department of Chemistry and Nuclear & WMD Protection Research Center, Korea Military Academy,

Seoul 01805, South Korea

<sup>b</sup> Chemical Kinomics Research Center, Korea Institute of Science and Technology, Seoul 02792, South

Korea

## Table of contents

|                                                                                                                                          |        |
|------------------------------------------------------------------------------------------------------------------------------------------|--------|
| P=O bond distance of each Novichok agent                                                                                                 | S3     |
| P-F bond distance of each Novichok agent                                                                                                 | S3     |
| The structure of A234 proposed by Mirzayanov                                                                                             | S4     |
| Comparison of Frequencies (cm <sup>-1</sup> ) Related to P Atom in each calculated level of theory including experimental data.          | S5     |
| Calculated scaring factor and R-squared value by comparison of calculated IR spectra and experimental IR spectra at each level of theory | S6     |
| Geometrical parameters of studied structures                                                                                             | S7-S22 |

| Novichok agent candidate | P=O (Å)            |                    |                     |
|--------------------------|--------------------|--------------------|---------------------|
|                          | B3LYP <sub>1</sub> | B3LYP <sub>2</sub> | M06-2X <sub>2</sub> |
| <b>A230</b>              | 1.48771            | 1.46336            | 1.45565             |
| <b>A232</b>              | 1.48782            | 1.46381            | 1.45604             |
| <b>A234</b>              | 1.48812            | 1.46366            | 1.45610             |

B3LYP/6-311++G(d,p) denoted as B3LYP<sub>1</sub> denotes, B3LYP/6-311++G(2d,2p) denoted as B3LYP<sub>2</sub>, and M06-2X/6-311++G(2d,2p) denoted as M06-2X<sub>2</sub> denotes.

| Novichok agent candidate | P-F (Å)            |                    |                     |
|--------------------------|--------------------|--------------------|---------------------|
|                          | B3LYP <sub>1</sub> | B3LYP <sub>2</sub> | M06-2X <sub>2</sub> |
| <b>A230</b>              | 1.57856            | 1.56019            | 1.54448             |
| <b>A232</b>              | 1.57961            | 1.56158            | 1.54519             |
| <b>A234</b>              | 1.58079            | 1.56171            | 1.54562             |

B3LYP/6-311++G(d,p) denoted as B3LYP<sub>1</sub> denotes, B3LYP/6-311++G(2d,2p) denoted as B3LYP<sub>2</sub>, and M06-2X/6-311++G(2d,2p) denoted as M06-2X<sub>2</sub> denotes.

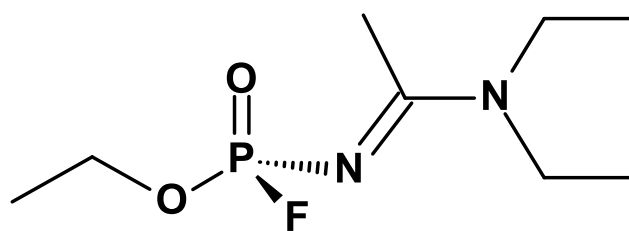

Chemical Structure of A-234 proposed by Mirzayanov

| Experimental data |      |     |      |     |
|-------------------|------|-----|------|-----|
|                   | P=O  | P-C | P-O  | P-F |
| GA                | 1286 |     | 792  |     |
| GB                | 1303 | 775 | 1016 | 840 |
| GD                | 1279 | 844 | 988  | 754 |
| VX                | 1227 | 729 | 964  |     |

| B3LYP/6-311++G(d,p) |      |     |     |     |
|---------------------|------|-----|-----|-----|
|                     | P=O  | P-C | P-O | P-F |
| GA                  | 1270 |     | 785 |     |
| GB                  | 1279 | 753 | 992 | 799 |
| GD                  | 1282 | 797 | 986 | 747 |
| VX                  | 1218 | 750 | 925 |     |

| B3LYP/6-311++G(2d,2p) |      |     |     |     |
|-----------------------|------|-----|-----|-----|
|                       | P=O  | P-C | P-O | P-F |
| GA                    | 1282 |     | 792 |     |
| GB                    | 1293 | 757 | 995 | 807 |
| GD                    | 1291 | 805 | 989 | 748 |
| VX                    | 1230 | 723 | 994 |     |

| M06-2X/6-311++G(2d,2p) |      |     |      |     |
|------------------------|------|-----|------|-----|
|                        | P=O  | P-C | P-O  | P-F |
| GA                     | 1317 |     | 832  |     |
| GB                     | 1324 | 792 | 1046 | 844 |
| GD                     | 1325 | 814 | 1044 | 841 |
| VX                     | 1274 | 778 | 1029 |     |

Comparison of Frequencies ( $\text{cm}^{-1}$ ) Related to P Atom in each calculated level of theory including experimental data.

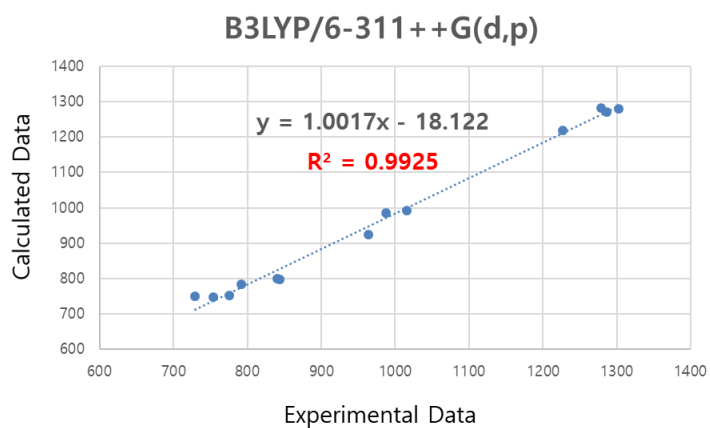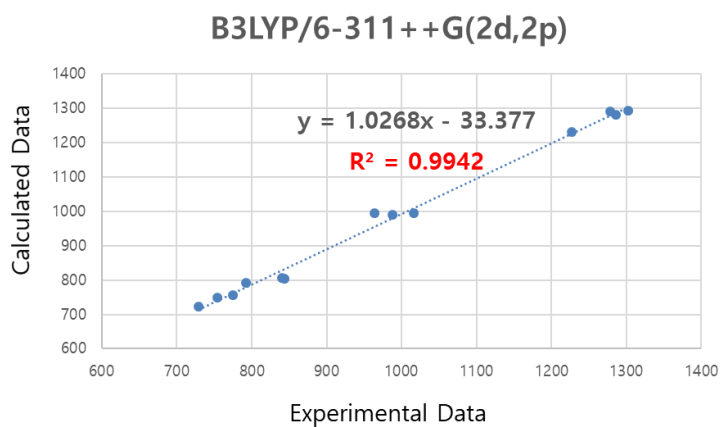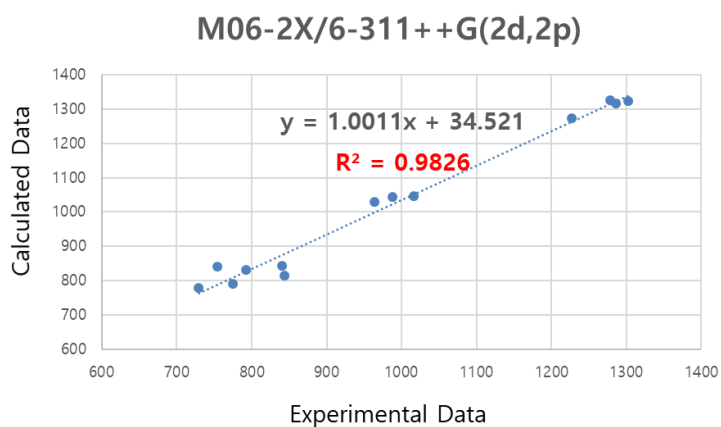

Calculated scaling factor and R-squared value by comparison of calculated IR spectra and experimental IR spectra at each level of theory

## Coordinates of GA

|   |             |             |             |
|---|-------------|-------------|-------------|
| P | -0.82166673 | 0.44589106  | -0.24287997 |
| O | -1.59143378 | 1.04689625  | 0.88183974  |
| O | -0.13150184 | -0.96376760 | -0.01438259 |
| C | -0.89119751 | -2.18240599 | 0.33443918  |
| H | -1.56042962 | -1.93870503 | 1.16021656  |
| C | 0.10419142  | -3.25041572 | 0.71261734  |
| H | 0.77817021  | -3.47452200 | -0.11716130 |
| H | 0.69359948  | -2.94959096 | 1.58158964  |
| H | -1.47730463 | -2.46459061 | -0.54209453 |
| H | -0.44227813 | -4.16253500 | 0.96778178  |
| C | -1.99556717 | 0.10771257  | -1.59580304 |
| N | -2.72248038 | -0.03312339 | -2.48463291 |
| N | 0.39545642  | 1.36674042  | -0.86118652 |
| C | 1.18867795  | 0.83834390  | -1.99032606 |
| H | 0.65598963  | 0.95549509  | -2.94039918 |
| H | 2.12245901  | 1.39967944  | -2.03996191 |
| H | 1.42377201  | -0.21183981 | -1.83217832 |
| C | 0.14224782  | 2.81908579  | -0.96371241 |

|   |             |            |             |
|---|-------------|------------|-------------|
| H | -0.41417511 | 3.06563900 | -1.87425749 |
| H | -0.41054717 | 3.16970816 | -0.09437776 |
| H | 1.10543682  | 3.33031718 | -0.99151623 |

### **Coordinates of GB**

|   |             |             |             |
|---|-------------|-------------|-------------|
| P | -1.14726689 | 0.12293238  | 0.17158117  |
| O | -1.51191772 | 0.25833044  | 1.61055255  |
| F | 0.43926942  | 0.40186174  | 0.01141917  |
| O | -1.33108805 | -1.31251135 | -0.47741985 |
| C | -1.08045913 | -2.59621105 | 0.24116526  |
| H | -0.82006770 | -2.34658750 | 1.27090047  |
| C | 0.08180475  | -3.27942384 | -0.45078575 |
| H | 0.30109612  | -4.22315540 | 0.05568053  |
| H | -0.16204656 | -3.49647865 | -1.49425279 |
| H | 0.97879344  | -2.65723496 | -0.41827648 |
| C | -2.37659374 | -3.38000345 | 0.20373088  |
| H | -3.17967445 | -2.83004319 | 0.69885028  |
| H | -2.67246344 | -3.59061784 | -0.82744176 |
| H | -2.23949834 | -4.33146177 | 0.72444126  |



|   |             |            |             |
|---|-------------|------------|-------------|
| C | -1.87763482 | 1.25463511 | -0.99619487 |
| H | -2.95896861 | 1.10778351 | -0.99355889 |
| H | -1.47943018 | 1.06838402 | -1.99428827 |
| H | -1.64660783 | 2.27516069 | -0.68659916 |

### Coordinates of GD

|   |             |             |             |
|---|-------------|-------------|-------------|
| P | -1.29051396 | -0.05175260 | 0.33432467  |
| O | -2.14172081 | 0.04521799  | 1.55440945  |
| F | 0.26284758  | -0.10624803 | 0.78735625  |
| O | -1.46224997 | -1.35570407 | -0.55154016 |
| C | -1.76884508 | -2.71518569 | -0.00661429 |
| H | -2.09015095 | -2.57008104 | 1.02478376  |
| C | -0.48408359 | -3.55201453 | -0.07878172 |
| H | -0.45766114 | -4.06905727 | -1.04437838 |
| H | 0.36571089  | -2.86429293 | -0.06582381 |
| C | -2.92040676 | -3.22787377 | -0.84914869 |
| H | -3.79531148 | -2.58231209 | -0.74539579 |
| H | -2.63179278 | -3.26903532 | -1.90293040 |
| H | -3.19657569 | -4.23520763 | -0.53249190 |

|   |             |             |             |
|---|-------------|-------------|-------------|
| C | -1.31803389 | 1.30285520  | -0.82334551 |
| H | -0.62665838 | 1.10678117  | -1.64362483 |
| H | -1.02652199 | 2.21546133  | -0.30057219 |
| H | -2.33235563 | 1.41256205  | -1.21052224 |
| C | -0.25201203 | -4.58604008 | 1.05670873  |
| C | -1.41278639 | -5.59014718 | 1.17349654  |
| H | -1.17810376 | -6.35089816 | 1.92483509  |
| H | -2.34400472 | -5.10413799 | 1.47805858  |
| H | -1.59122242 | -6.10339672 | 0.22337372  |
| C | 1.03685136  | -5.35545918 | 0.71165672  |
| H | 1.27402450  | -6.08302424 | 1.49408713  |
| H | 0.93005672  | -5.89900524 | -0.23263341 |
| H | 1.88916136  | -4.67538713 | 0.61361264  |
| C | -0.05511701 | -3.87015967 | 2.40571663  |
| H | 0.17941376  | -4.59607493 | 3.19067306  |
| H | 0.76953710  | -3.15212051 | 2.35365247  |
| H | -0.95262299 | -3.32930253 | 2.71922490  |

**Coordinates of VX**

|   |             |             |             |
|---|-------------|-------------|-------------|
| P | -2.53286002 | -0.35825811 | 0.33416839  |
| O | -2.98829232 | 0.62660855  | -0.87387146 |
| S | -1.21098599 | -1.68245463 | -0.64768420 |
| C | -3.95561002 | -1.38452612 | 0.75069271  |
| O | -1.95175422 | 0.39241024  | 1.50518549  |
| C | -3.70829089 | 1.87464234  | -0.59229408 |
| C | 0.26113820  | -0.57833810 | -0.91414165 |
| C | -3.97501913 | 2.55819390  | -1.91252988 |
| C | 1.25356999  | -0.62078757 | 0.25279946  |
| N | 2.43215065  | 0.20214352  | -0.02442031 |
| C | 3.46472173  | -0.50147657 | -0.82256475 |
| C | 2.90216796  | 1.02546563  | 1.11617361  |
| C | 4.33599555  | 0.47956827  | -1.61454927 |
| C | 4.34814232  | -1.49881314 | -0.05008159 |
| C | 3.05393510  | 0.29030025  | 2.46371184  |
| C | 2.00130137  | 2.25547826  | 1.29472211  |
| H | -3.66802773 | -2.10612742 | 1.51702675  |
| H | -4.73811214 | -0.73371601 | 1.14844127  |
| H | -4.32840565 | -1.90431082 | -0.13311647 |

|   |             |             |             |
|---|-------------|-------------|-------------|
| H | -3.08620613 | 2.48971160  | 0.05989227  |
| H | -4.63777226 | 1.62775712  | -0.07356645 |
| H | -4.50902501 | 3.49478548  | -1.72915118 |
| H | -3.04013101 | 2.79221004  | -2.42765651 |
| H | -4.59243638 | 1.93331577  | -2.56233415 |
| H | 0.70344416  | -0.95081804 | -1.83857222 |
| H | -0.09980799 | 0.43364536  | -1.09743123 |
| H | 1.51405723  | -1.66734225 | 0.46588362  |
| H | 0.74854933  | -0.24042363 | 1.13944346  |
| H | 2.89992738  | -1.08161139 | -1.55883997 |
| H | 3.89185106  | 1.38952138  | 0.83162331  |
| H | 5.00603646  | -0.07301008 | -2.27993038 |
| H | 3.72473860  | 1.14743845  | -2.22723913 |
| H | 4.96197043  | 1.09308112  | -0.96037581 |
| H | 3.75151125  | -2.19253432 | 0.54791656  |
| H | 4.93700465  | -2.09195621 | -0.75674760 |
| H | 5.04831892  | -0.98430619 | 0.61359921  |
| H | 3.51452190  | 0.96151190  | 3.19534012  |
| H | 2.08458513  | -0.01425792 | 2.86944780  |

|   |            |             |            |
|---|------------|-------------|------------|
| H | 3.68270303 | -0.59695855 | 2.38348295 |
| H | 2.37413130 | 2.88686342  | 2.10725421 |
| H | 1.96818557 | 2.85836313  | 0.38361726 |
| H | 0.97600834 | 1.96644836  | 1.54732203 |

### Coordinates of A230

|    |             |             |             |
|----|-------------|-------------|-------------|
| P  | -1.63966716 | 1.96713463  | 2.08010990  |
| O  | -2.72122227 | 2.92075039  | 2.37818603  |
| F  | -1.06819295 | 1.24851286  | 3.36418491  |
| O  | -1.92094079 | 0.80492668  | 1.06042954  |
| C  | -3.27239456 | 0.30211935  | 0.76069835  |
| H  | -3.74219090 | -0.01875773 | 1.68922157  |
| H  | -3.84043163 | 1.10751011  | 0.29843083  |
| C  | -3.05426403 | -0.85586678 | -0.18840160 |
| H  | -2.49185873 | -1.65975209 | 0.27924216  |
| H  | -2.57416462 | -0.53538427 | -1.10943303 |
| Cl | -4.67667305 | -1.53724858 | -0.64441321 |
| O  | -0.20520321 | 2.56420757  | 1.59555714  |
| N  | -0.31371025 | 3.31092267  | 0.39882748  |

|    |            |            |             |
|----|------------|------------|-------------|
| C  | 0.80949560 | 3.80178875 | 0.06893468  |
| Cl | 2.31223814 | 3.66941968 | 0.86530414  |
| F  | 0.84528330 | 4.52135741 | -1.03490100 |

### Coordinates of A232

|    |             |             |             |
|----|-------------|-------------|-------------|
| P  | -1.66817126 | 0.34690426  | -0.52278559 |
| O  | -1.83150354 | -1.02042806 | 0.00032699  |
| F  | -2.18813178 | 0.51161096  | -2.00524267 |
| O  | -2.30189114 | 1.56154383  | 0.23718353  |
| C  | -3.33381326 | 1.58560406  | 1.31637144  |
| H  | -3.51006814 | 2.65523940  | 1.41437776  |
| C  | -4.58687264 | 0.90906182  | 0.77231566  |
| H  | -4.48988746 | -0.17395586 | 0.73769532  |
| H  | -4.84156401 | 1.30339229  | -0.20835616 |
| Cl | -6.00573320 | 1.26974122  | 1.85161180  |
| O  | -0.14792767 | 0.84021748  | -0.85548839 |
| N  | 0.68261296  | 0.80340720  | 0.28670830  |
| C  | 1.87029984  | 1.14353953  | -0.00403096 |
| Cl | 2.51286584  | 1.59861369  | -1.51747702 |

|   |             |             |            |
|---|-------------|-------------|------------|
| F | 2.74893606  | 1.15220465  | 0.97920221 |
| C | -2.77020940 | 1.00804293  | 2.59514980 |
| H | -2.58154646 | -0.06331284 | 2.50329467 |
| H | -1.84291191 | 1.51899180  | 2.85956372 |
| H | -3.48493772 | 1.16582802  | 3.40556565 |

#### **Coordinates of A234**

|    |             |            |             |
|----|-------------|------------|-------------|
| P  | -2.54443866 | 1.28369673 | -0.39751322 |
| O  | -3.15302115 | 0.00565664 | -0.80483851 |
| F  | -3.48091864 | 2.52575028 | -0.67892328 |
| O  | -2.03650593 | 1.49292919 | 1.06866985  |
| C  | -2.41194152 | 0.80242104 | 2.34132085  |
| H  | -1.67300143 | 1.21512958 | 3.02702001  |
| C  | -3.80821127 | 1.30428322 | 2.73224461  |
| H  | -4.55124594 | 0.92181898 | 2.03212926  |
| Cl | -4.24993225 | 0.50617634 | 4.33691556  |
| O  | -1.30560796 | 1.83773295 | -1.30538845 |
| N  | -0.21792102 | 0.93685527 | -1.33363180 |
| C  | 0.71854880  | 1.37924748 | -2.06730361 |

|    |             |             |             |
|----|-------------|-------------|-------------|
| Cl | 0.78932615  | 2.83834412  | -2.94914607 |
| F  | 1.79908913  | 0.63115555  | -2.17616960 |
| C  | -2.24061430 | -0.69737187 | 2.20777547  |
| H  | -3.03780796 | -1.14997755 | 1.61668970  |
| H  | -1.27703086 | -0.91592856 | 1.74401998  |
| H  | -2.24232914 | -1.14815752 | 3.20045773  |
| C  | -3.91085789 | 2.80858708  | 2.89730362  |
| H  | -3.19133495 | 3.17288967  | 3.63410727  |
| H  | -3.71066198 | 3.30130428  | 1.94359098  |
| H  | -4.91651808 | 3.08846308  | 3.21411951  |

#### Coordinates of HF

|   |             |            |            |
|---|-------------|------------|------------|
| F | -0.07789602 | 0.45166403 | 0.00000000 |
| H | -1.00812607 | 0.45166403 | 0.00000000 |

#### Coordinates of Serine

|   |             |             |             |
|---|-------------|-------------|-------------|
| N | -2.50046308 | -2.55087763 | -0.48516740 |
| H | -1.71954531 | -2.81107713 | 0.11359802  |
| C | -3.05127095 | -1.27016330 | -0.03247731 |



|   |             |             |             |
|---|-------------|-------------|-------------|
| H | -3.92467078 | -1.02946352 | -0.63860360 |
| C | -3.46549753 | -1.29352908 | 1.44529634  |
| C | -2.00530239 | -0.19084903 | -0.24748450 |
| H | -4.20446527 | -2.09084227 | 1.57654306  |
| H | -2.59071842 | -1.51764632 | 2.06600013  |
| O | -4.02469418 | -0.02269301 | 1.80338845  |
| O | -0.83824454 | -0.30352899 | 0.07383409  |
| H | -4.26053435 | -0.05263261 | 2.73878589  |
| H | -3.21116521 | -3.26824721 | -0.36534946 |
| O | -2.50066483 | 0.91909631  | -0.81814573 |
| H | -1.79243966 | 1.58310417  | -0.89252113 |

#### **Coordinates of A230-Serine Complex**

|   |             |            |             |
|---|-------------|------------|-------------|
| P | -1.52927189 | 1.62153497 | 2.34384219  |
| O | -2.58532694 | 2.59509239 | 2.71159476  |
| O | -1.95395470 | 0.52531077 | 1.27140405  |
| C | -3.15499693 | 0.62476517 | 0.44242805  |
| H | -4.00531445 | 0.88150778 | 1.07254505  |
| H | -2.99803686 | 1.39378277 | -0.31291237 |

|    |             |             |             |
|----|-------------|-------------|-------------|
| C  | -3.31770953 | -0.74550085 | -0.18147853 |
| H  | -3.48259074 | -1.51309008 | 0.57035350  |
| H  | -2.47275002 | -1.00408678 | -0.81462818 |
| Cl | -4.79055971 | -0.72625533 | -1.25097910 |
| O  | -0.13687640 | 2.28116950  | 1.75405234  |
| N  | -0.35887457 | 3.01681052  | 0.57621564  |
| C  | 0.70807115  | 3.55784572  | 0.15736745  |
| Cl | 2.27833863  | 3.49294192  | 0.82941308  |
| F  | 0.62873638  | 4.27976317  | -0.94611055 |
| O  | -0.80675630 | 0.81793693  | 3.49922837  |
| C  | -1.53373518 | 0.29921284  | 4.66096473  |
| C  | -0.50590585 | -0.25216361 | 5.65065087  |
| H  | -2.19703359 | -0.50223049 | 4.33393496  |
| H  | -2.10817575 | 1.11020210  | 5.11071744  |
| N  | -1.14261978 | -0.77691230 | 6.85999297  |
| H  | 0.05801786  | -1.05104210 | 5.17138874  |
| C  | 0.45723344  | 0.85628223  | 6.05071755  |
| H  | -1.72564724 | -0.05425498 | 7.27708984  |
| H  | -1.75910889 | -1.54255188 | 6.60006042  |

|   |            |            |            |
|---|------------|------------|------------|
| O | 0.14776671 | 1.79434222 | 6.75754558 |
| O | 1.68484825 | 0.69679665 | 5.53610357 |
| H | 2.24612626 | 1.44391453 | 5.81042975 |

### Coordinates of A232-Serine Complex

|    |             |             |             |
|----|-------------|-------------|-------------|
| P  | -1.82546637 | 0.08408976  | -0.44745688 |
| O  | -1.98715535 | -1.13397558 | 0.38293405  |
| O  | -2.16940074 | 1.49061517  | 0.18700217  |
| C  | -3.21210214 | 1.85224006  | 1.17804211  |
| H  | -3.10740640 | 2.93528587  | 1.21886508  |
| C  | -4.56782800 | 1.49809239  | 0.57654835  |
| H  | -4.75989938 | 0.42663512  | 0.59378336  |
| H  | -4.65834068 | 1.88658711  | -0.43420766 |
| Cl | -5.90386531 | 2.27620962  | 1.53926337  |
| O  | -0.28630896 | 0.34079413  | -0.98392480 |
| N  | 0.67188539  | 0.31626195  | 0.04599989  |
| C  | 1.84064815  | 0.51518792  | -0.40323620 |
| Cl | 2.33791112  | 0.78958075  | -2.01595642 |
| F  | 2.83323838  | 0.51722806  | 0.46924941  |

|   |             |             |             |
|---|-------------|-------------|-------------|
| C | -2.91512516 | 1.23701033  | 2.52989275  |
| H | -3.05204186 | 0.15456666  | 2.51953387  |
| H | -1.89136372 | 1.46896756  | 2.82882020  |
| H | -3.58891318 | 1.66507761  | 3.27487981  |
| O | -2.57462457 | 0.11069643  | -1.84647110 |
| C | -2.62686018 | -1.05823153 | -2.72714288 |
| C | -3.26432602 | -0.62843026 | -4.05221979 |
| H | -3.24403829 | -1.82351314 | -2.25646901 |
| H | -1.61463499 | -1.43397464 | -2.88893917 |
| N | -3.41051136 | -1.75524734 | -4.97409126 |
| H | -4.24723840 | -0.20506149 | -3.84878246 |
| C | -2.40296319 | 0.43829460  | -4.71083870 |
| H | -2.50382185 | -2.19395005 | -5.12070746 |
| H | -4.01175128 | -2.45366374 | -4.54430639 |
| O | -1.36535752 | 0.20323653  | -5.29689069 |
| O | -2.89876344 | 1.67561381  | -4.56373800 |
| H | -2.28823825 | 2.31399922  | -4.97355149 |

### Coordinates of A234-Serine Complex

|    |             |             |             |
|----|-------------|-------------|-------------|
| P  | -2.75803604 | 1.35656348  | -0.46729392 |
| O  | -3.12171576 | 0.07881763  | -1.12648970 |
| O  | -1.98831844 | 1.31157315  | 0.91156787  |
| C  | -2.37044026 | 0.69587174  | 2.20525211  |
| H  | -1.40294272 | 0.57943964  | 2.69317437  |
| C  | -3.19702921 | 1.74221050  | 2.96938758  |
| H  | -4.20272943 | 1.80245517  | 2.55618203  |
| Cl | -3.45031819 | 1.08621491  | 4.67896212  |
| O  | -1.72300041 | 2.28942732  | -1.35427215 |
| N  | -0.56980041 | 1.60157922  | -1.77382085 |
| C  | 0.24580929  | 2.37808367  | -2.35630436 |
| Cl | 0.10056600  | 4.05439493  | -2.66179248 |
| F  | 1.37266917  | 1.85006768  | -2.80187838 |
| C  | -3.03755634 | -0.65215904 | 2.01377019  |
| H  | -4.03112289 | -0.55288349 | 1.57014667  |
| H  | -2.42146996 | -1.28968904 | 1.37820230  |
| H  | -3.14157263 | -1.14387445 | 2.98141132  |
| C  | -2.55167201 | 3.11067999  | 3.06361292  |
| H  | -1.54848665 | 3.04655404  | 3.49181734  |

|   |             |            |             |
|---|-------------|------------|-------------|
| H | -2.47760014 | 3.54747067 | 2.06575608  |
| H | -3.15901853 | 3.77561152 | 3.67944558  |
| O | -3.92302168 | 2.41050953 | -0.25001628 |
| C | -5.01928873 | 2.60022689 | -1.20217791 |
| C | -5.36973961 | 4.09249132 | -1.27536442 |
| H | -5.87795366 | 2.04677344 | -0.82325135 |
| H | -4.73651587 | 2.22023330 | -2.18489339 |
| N | -6.53320485 | 4.32698762 | -2.12938351 |
| H | -5.58543078 | 4.45092982 | -0.26902228 |
| C | -4.18560447 | 4.87313314 | -1.82283517 |
| H | -6.33939644 | 3.98270087 | -3.06727029 |
| H | -7.31682349 | 3.78702535 | -1.77131170 |
| O | -3.93887121 | 4.99021596 | -3.00644860 |
| O | -3.42205394 | 5.40582490 | -0.85799303 |
| H | -2.65852917 | 5.85227587 | -1.26516742 |
